# Supplementary material for: Dynamic functioning of transient resting‐state coactivation networks in the Human Connectome Project
Source: PubMed Central journal article supplement — Hum Brain Mapp. 2019 Oct 22;41(2):373–87. doi: 10.1002/hbm.24808 (PMC7268046; doi:10.1002/hbm.24808), 2019-10-22
Supplement: HBM-41-373-s002.pdf [file HBM-41-373-s002.pdf]

| State                            | LH_VisCent_Striate | LH_VisCent_ExStr | LH_VisPeri_Striate | LH_VisPeri_ExStrInf | LH_VisPeri_ExStrSup | RH_VisCent_Striate | RH_VisCent_ExStr | RH_VisPeri_Striate | RH_VisPeri_ExStrInf |
|----------------------------------|--------------------|------------------|--------------------|---------------------|---------------------|--------------------|------------------|--------------------|---------------------|
| 0                                | -0.274794245       | -1.108431357     | -1.160787451       | -1.176614609        | -1.380883717        | -0.179609276       | -1.096326569     | -1.113602241       | -0.963463887        |
| 1                                | -0.063017034       | -0.859849001     | -1.344163726       | -1.604276391        | -2.053637619        | -0.103025403       | -0.734513084     | -1.388595131       | -1.444705699        |
| 2                                | -0.03999081        | -0.898621926     | -0.724772484       | -0.771775222        | -0.654496126        | 0.006871992        | -0.811114436     | -0.725865373       | -0.728313869        |
| 3                                | -0.291489686       | 0.579309543      | 0.284667096        | 0.491719312         | 0.418167215         | -0.327782746       | 0.431357058      | 0.259336402        | 0.506548082         |
| 4                                | -0.731451579       | -1.193404564     | -1.435569418       | -1.45993434         | -1.81005588         | -0.694302937       | -1.308208486     | -1.369385848       | -1.207343997        |
| 5                                | 0.590835442        | 1.531521764      | 1.680389531        | 1.729780336         | 2.051360043         | 0.517951399        | 1.553225766      | 1.613853298        | 1.461329989         |
| 6                                | 0.589947778        | 1.830111255      | 1.766417018        | 2.097777139         | 2.16552187          | 0.588482722        | 1.885948669      | 1.779802827        | 1.866764707         |
| 7                                | 0.295969335        | 0.258412642      | 0.960657472        | 0.540969139         | 0.891189451         | 0.232299774        | 0.209993898      | 0.936882803        | 0.4568676           |
| Region of Intest number in Atlas | 1                  | 2                | 3                  | 4                   | 5                   | 58                 | 59               | 60                 | 61                  |

Values represent the activations/deactivations for each region of interest within each state as shown graphically in Figure 3. Changes in color represent divisions between networks as defined in Figure 3.

| State                            | RH_VisPeri_ ExStrSup | LH_SomMotA  | LH_SomMotB_Cent | LH_SomMotB_S2 | LH_SomMotB_Ins | LH_SomMotB_Aud | RH_SomMotA   | RH_SomMotB_Cent | RH_SomMotB_S2 | RH_SomMotB_Ins |
|----------------------------------|----------------------|-------------|-----------------|---------------|----------------|----------------|--------------|-----------------|---------------|----------------|
| 0                                | -1.366827313         | -0.9734939  | -0.521255504    | -1.627964748  | 0.946048944    | -1.527942564   | -0.531361035 | -0.552182654    | -1.587715189  | 0.317965855    |
| 1                                | -2.165430127         | -0.85251083 | -0.443506902    | -0.874329479  | -0.708421498   | -0.638132524   | -0.937314407 | -0.678638723    | -0.941966849  | -0.688043385   |
| 2                                | -0.58253899          | -0.87808628 | -0.743149147    | -1.222050271  | -0.220847868   | -0.837754939   | -0.734859531 | -0.77339378     | -1.130047724  | -0.299722171   |
| 3                                | 0.383076258          | 0.687830639 | 0.422321129     | 0.792775436   | -0.258353282   | 0.542484752    | 0.555228668  | 0.378857785     | 0.669144123   | -0.031541186   |
| 4                                | -1.771254544         | -0.63685124 | -0.240935815    | -0.845305562  | 0.878433222    | -1.008097198   | -0.34632591  | -0.280002128    | -0.910423124  | 0.350826494    |
| 5                                | 2.007117149          | 1.058261098 | 0.508626147     | 1.532639377   | -0.973260842   | 1.507811       | 0.644667855  | 0.54506092      | 1.525479103   | -0.317113242   |
| 6                                | 2.085684356          | 1.501862994 | 1.307960678     | 1.497436736   | 0.599380295    | 1.095344387    | 1.42655322   | 1.558337346     | 1.563797912   | 0.585830228    |
| 7                                | 0.915460957          | 0.145854787 | -0.07308828     | 1.023471566   | -0.121745      | 1.012241806    | -0.029606187 | -0.118399008    | 0.985506601   | 0.260440006    |
| Region of Intest number in Atlas | 62                   | 6           | 7               | 8             | 9              | 10             | 63           | 64              | 65            | 66             |

Values represent the activations/deactivations for each region of interest within each state as shown graphically in Figure 3. Changes in color represent divisions between networks as defined in Figure 3.

| State                            | RH_SomMotB_Aud | LH_DorsAttnA_TempOcc | LH_DorsAttnA_ParOcc | LH_DorsAttnA_SPL | LH_DorsAttnB_TempOcc | LH_DorsAttnB_PostC | LH_DorsAttnB_FEF | LH_DorsAttnB_PrCv | RH_DorsAttnA_TempOcc |
|----------------------------------|----------------|----------------------|---------------------|------------------|----------------------|--------------------|------------------|-------------------|----------------------|
| 0                                | -1.300882687   | -1.263316299         | -1.122512668        | -1.565789007     | 0.020926882          | -1.397495991       | -1.042925371     | -0.306455795      | -0.98577038          |
| 1                                | -0.777190328   | 0.05311512           | -0.720940889        | -0.280274637     | 0.064425726          | -0.704677421       | 0.031756846      | 0.658362776       | -0.165694254         |
| 2                                | -0.791025949   | -0.820976438         | -0.162062358        | -0.922015899     | -0.49840053          | -1.133173068       | -1.067637833     | -0.923067338      | -0.802130247         |
| 3                                | 0.380308932    | 1.386974552          | 0.792508589         | 1.880302517      | 0.640447681          | 1.553969275        | 1.578052492      | 1.351077486       | 1.223280281          |
| 4                                | -0.857343589   | -0.572033493         | -1.140932424        | -0.407584109     | 0.525894658          | -0.279836553       | 0.39566785       | 0.961444201       | -0.320153607         |
| 5                                | 1.281890534    | 1.253879528          | 1.415481499         | 1.430799387      | -0.179790423         | 1.217669345        | 0.622141235      | -0.171575792      | 0.950244741          |
| 6                                | 1.218042986    | 0.510383716          | 0.632523501         | -0.203329098     | -0.093922739         | 0.521371048        | -0.511393066     | -0.5982288        | 0.558307687          |
| 7                                | 0.911087494    | -0.527905223         | -0.304308642        | 0.000268215      | -0.024946095         | 0.334176265        | 0.399844047      | -0.323304272      | -0.44216053          |
| Region of Intest number in Atlas | 67             | 11                   | 12                  | 13               | 14                   | 15                 | 16               | 17                | 68                   |

Values represent the activations/deactivations for each region of interest within each state as shown graphically in Figure 3. Changes in color represent divisions between networks as defined in Figure 3.

| State                            | RH_DorsAttnA_ParOcc | RH_DorsAttnA_SPL | RH_DorsAttnB_TempOcc | RH_DorsAttnB_PostC | RH_DorsAttnB_FEF | RH_DorsAttnB_PrCv | LH_SalVentAttnA_ParOper | LH_SalVentAttnA_PrCv |
|----------------------------------|---------------------|------------------|----------------------|--------------------|------------------|-------------------|-------------------------|----------------------|
| 0                                | -0.930785563        | -1.579348721     | -0.324609813         | -1.506404334       | -0.918257939     | -0.80848845       | -1.082049248            | -1.343290315         |
| 1                                | -1.188603489        | -0.58166506      | -0.337360792         | -1.007736841       | -0.425933647     | 0.694520363       | -0.565952153            | -0.257583827         |
| 2                                | -0.468336679        | -0.946301185     | -0.628374677         | -1.253759664       | -1.009387868     | -1.143781803      | -1.650034757            | -1.802620979         |
| 3                                | 0.777037232         | 1.907030786      | 0.852463208          | 1.561776366        | 1.733971821      | 1.655876078       | 1.499851589             | 1.321787766          |
| 4                                | -0.804881802        | -0.453816443     | 0.45599939           | -0.3699663         | 0.55221705       | 0.908304759       | 0.824454314             | 0.570627954          |
| 5                                | 1.172097721         | 1.489182391      | 0.085856672          | 1.350201996        | 0.517414536      | 0.164386392       | 0.435726087             | 0.680643673          |
| 6                                | 1.072777209         | -0.066842626     | 0.001765306          | 0.803740322        | -0.660850535     | -0.835018244      | -0.1529745              | 0.107594383          |
| 7                                | -0.139983953        | 0.133183104      | 0.019861249          | 0.521811992        | 0.488681646      | 0.050831323       | 1.650979689             | 1.897565832          |
| Region of Intest number in Atlas | 69                  | 70               | 71                   | 72                 | 73               | 74                | 18                      | 19                   |

Values represent the activations/deactivations for each region of interest within each state as shown graphically in Figure 3. Changes in color represent divisions between networks as defined in Figure 3.

| State                            | LH_SalVentAttnA_Ins | LH_SalVentAttnA_ParMed | LH_SalVentAttnA_FrMed | LH_SalVentAttnB_IPL | LH_SalVentAttnB_PFCd | LH_SalVentAttnB_PFCf | LH_SalVentAttnB_PFCv | LH_SalVentAttnB_OFc |
|----------------------------------|---------------------|------------------------|-----------------------|---------------------|----------------------|----------------------|----------------------|---------------------|
| 0                                | -0.908529367        | -1.344796721           | -0.390121251          | -0.042171781        | 0.981899004          | -0.462082996         | 1.135043599          | 1.377650989         |
| 1                                | -0.414111668        | -0.956308466           | -0.422926904          | 0.759041558         | 0.679614686          | 0.300117217          | 0.38304156           | -0.322829649        |
| 2                                | -1.361571648        | -0.933125099           | -0.959357053          | -0.85308142         | 0.164638643          | -0.585046269         | -0.199982738         | -0.329467047        |
| 3                                | 0.951682436         | 0.871096698            | 0.585738955           | 0.83365008          | -0.408442348         | 0.525383489          | 0.122010703          | 0.099530698         |
| 4                                | 0.544585262         | -0.441544488           | 0.458330236           | 1.405775569         | 0.873921669          | 0.558845268          | 1.385799879          | 1.814352267         |
| 5                                | 0.404189987         | 1.192090501            | 0.135103294           | -0.636569081        | -1.105726365         | 0.043775758          | -1.326818853         | -1.657807645        |
| 6                                | 0.029654323         | 0.333597341            | 0.092927319           | -1.369613319        | -0.491028039         | -1.096423972         | -0.802016098         | -0.602441761        |
| 7                                | 1.652624518         | 1.54715199             | 1.281523838           | 1.033357337         | -0.252889774         | 1.436914439          | 0.222228176          | 0.232460103         |
| Region of Intest number in Atlas | 20                  | 21                     | 22                    | 23                  | 24                   | 25                   | 26                   | 27                  |

Values represent the activations/deactivations for each region of interest within each state as shown graphically in Figure 3. Changes in color represent divisions between networks as defined in Figure 3.

| State                            | LH_SalVentAttnB_PFCmp | RH_SalVentAttnA_ParOper | RH_SalVentAttnA_PrC | RH_SalVentAttnA_PrCv | RH_SalVentAttnA_Ins | RH_SalVentAttnA_ParMed | RH_SalVentAttnA_FrMed | RH_SalVentAttnB_IPL |
|----------------------------------|-----------------------|-------------------------|---------------------|----------------------|---------------------|------------------------|-----------------------|---------------------|
| 0                                | -0.134295442          | -1.417726544            | -0.350835312        | -1.326779604         | -0.640939907        | -1.324218363           | -1.22277192           | -0.417331868        |
| 1                                | 0.084691557           | -1.140424229            | -0.495362523        | -0.84941405          | -0.711564254        | -1.538786626           | -0.749132442          | -0.224190204        |
| 2                                | -0.340889267          | -1.900321038            | -1.357881681        | -1.918138149         | -1.2877501          | -1.219676242           | -1.56308717           | -1.345666692        |
| 3                                | -0.075795765          | 1.550113959             | 0.8500141           | 1.205045702          | 0.680968018         | 0.964118118            | 1.090222386           | 1.224609408         |
| 4                                | 0.322202059           | 0.590586571             | 0.820598437         | 0.60483126           | 0.702867691         | -0.162125655           | 0.411583488           | 1.522319893         |
| 5                                | -0.082070187          | 0.794896302             | -0.02665358         | 0.673107504          | 0.134048938         | 1.091762102            | 0.709010366           | -0.368217322        |
| 6                                | -0.581348752          | 0.396090689             | 0.471473322         | 0.486155215          | 0.33007865          | 0.556160665            | 0.107833053           | -1.061178307        |
| 7                                | 1.446125166           | 1.955175875             | 0.957149605         | 2.166527059          | 1.448638292         | 1.883485669            | 2.119154181           | 1.772954855         |
| Region of Intest number in Atlas | 28                    | 75                      | 76                  | 77                   | 78                  | 79                     | 80                    | 81                  |

Values represent the activations/deactivations for each region of interest within each state as shown graphically in Figure 3. Changes in color represent divisions between networks as defined in Figure 3.

| State                            | RH_SalVentAttnB_PFCd | RH_SalVentAttnB_PFCi | RH_SalVentAttnB_PFCiv | RH_SalVentAttnB_PFCv | RH_SalVentAttnB_PFCmp | RH_SalVentAttnB_Cinga | LH_Limbic_TempPole | LH_Limbic_OFc |
|----------------------------------|----------------------|----------------------|-----------------------|----------------------|-----------------------|-----------------------|--------------------|---------------|
| 0                                | 0.750706258          | -0.23955696          | 0.707247947           | 0.884219464          | -0.253329625          | 0.99212897            | 1.62290092         | 1.426376164   |
| 1                                | 0.323044621          | -0.194686589         | 1.112589183           | -0.181187825         | -0.364170271          | -0.268049649          | -0.142021856       | 0.288550876   |
| 2                                | 0.169650562          | -0.464418947         | -0.271548175          | -0.420851062         | -0.371708853          | 0.171238397           | 0.138592289        | 0.458094341   |
| 3                                | -0.471746246         | 0.484660332          | 0.268057081           | -0.202052198         | -0.024445584          | -0.493113344          | -0.336732723       | -0.712068176  |
| 4                                | 0.701359401          | 0.85651198           | 1.510139321           | 1.423945427          | 0.495992864           | 0.792937485           | 1.214233918        | 0.661195555   |
| 5                                | -0.883311811         | -0.243047059         | -1.238337731          | -1.279332976         | -0.108849905          | -1.031741173          | -1.554725405       | -1.257820958  |
| 6                                | -0.546683614         | -1.258097553         | -1.188445995          | -0.047190313         | -0.711916812          | -0.088631426          | 0.054631406        | 0.314842219   |
| 7                                | 0.407598281          | 1.551388518          | -0.155687984          | 0.217494263          | 1.713470422           | 0.027353832           | -0.625409129       | -1.177473193  |
| Region of Intest number in Atlas | 82                   | 83                   | 84                    | 85                   | 86                    | 87                    | 29                 | 30            |

Values represent the activations/deactivations for each region of interest within each state as shown graphically in Figure 3. Changes in color represent divisions between networks as defined in Figure 3.

| State                            | RH_Limbic_TempPole | RH_Limbic_OFC | LH_ContA_Temp | LH_ContA_IPS | LH_ContA_PFCd | LH_ContA_PFCl | LH_ContA_PFClv | LH_ContA_Cinga | LH_ContB_Temp | LH_ContB_IPL | LH_ContB_PFCd |
|----------------------------------|--------------------|---------------|---------------|--------------|---------------|---------------|----------------|----------------|---------------|--------------|---------------|
| 0                                | 1.794432452        | 1.44346855    | 0.008656354   | -1.678617533 | 0.039317554   | -1.192180709  | -0.30217072    | 1.016899155    | 0.995834021   | -0.69798814  | 0.78093098    |
| 1                                | -0.624801522       | -0.083623261  | 1.06911247    | 1.374156468  | 0.649199358   | 2.234252125   | 1.964735673    | 0.060669113    | 1.344188966   | 2.566465463  | 1.688818266   |
| 2                                | 0.050549272        | 0.342614379   | 0.038906958   | -0.597196247 | 0.473374399   | -0.460038699  | -0.570949775   | 0.055384535    | 0.914003625   | 0.476631864  | 1.40711059    |
| 3                                | -0.616537211       | -0.60444359   | 0.821119994   | 2.044727205  | 0.447692693   | 1.410263874   | 1.294429132    | 0.011844688    | -0.522737132  | 0.672405025  | -0.772790833  |
| 4                                | 1.507103262        | 0.978487794   | 0.446005575   | -0.079804985 | 0.281259103   | -0.018532128  | 1.049810604    | 0.926226168    | 0.290178167   | -0.05855532  | -0.285963172  |
| 5                                | -1.850518896       | -1.414898518  | -0.189508944  | 1.178093044  | -0.193211942  | 0.728855823   | -0.313590584   | -1.035013767   | -0.898789922  | 0.303362204  | -0.561721714  |
| 6                                | 0.488886127        | 0.130086857   | -1.178895041  | -1.824020293 | -1.433715164  | -1.444371879  | -1.848347838   | -0.301223801   | -0.744661976  | -2.45203422  | -0.99640027   |
| 7                                | -0.718426195       | -0.801599998  | -0.813290427  | -0.200573617 | -0.61924517   | -0.722447091  | -0.359387879   | -0.452766087   | -1.556956359  | -0.56219031  | -1.785839884  |
| Region of Intest number in Atlas | 88                 | 89            | 31            | 32           | 33            | 34            | 35             | 36             | 37            | 38           | 39            |

Values represent the activations/deactivations for each region of interest within each state as shown graphically in Figure 3. Changes in color represent divisions between networks as defined in Figure 3.



| State                            | LH_ContB_PFCi | LH_ContB_PFCiv | LH_ContB_PFCmp | LH_ContC_pCun | LH_ContC_Cingp | RH_ContA_Temp | RH_ContA_IPS | RH_ContA_PFCd | RH_ContA_PFCi | RH_ContA_Cinga | RH_ContB_Temp | RH_ContB_IPL |
|----------------------------------|---------------|----------------|----------------|---------------|----------------|---------------|--------------|---------------|---------------|----------------|---------------|--------------|
| 0                                | -0.435716311  | 0.719370742    | 0.011257867    | -0.981878942  | 0.272470545    | 0.004558208   | -1.268426652 | 0.240049465   | -1.20530917   | 1.029477375    | 1.498679952   | -0.2200626   |
| 1                                | 2.141122093   | 1.909691423    | 2.389283668    | -0.769944473  | -0.799760186   | 0.987171626   | 0.910096666  | -0.016167732  | 1.336932993   | 0.047660293    | 0.489433119   | 1.418934472  |
| 2                                | 0.709235635   | 0.87837163     | 0.595735606    | 1.281050739   | 0.087194543    | 0.303969108   | -0.117191623 | 0.541426565   | -0.567034542  | 0.105677128    | 0.774964518   | 0.870367714  |
| 3                                | 0.138930378   | -0.501569033   | -0.042061967   | -0.522123428  | -0.166140302   | 0.684528696   | 1.589546502  | 0.43680165    | 1.377934755   | -0.052389903   | -0.604391699  | 0.092770305  |
| 4                                | -0.452955922  | 0.174702403    | 0.129672634    | -1.971422297  | 0.406685038    | 0.375951052   | -0.037713962 | 0.418000132   | 0.153441999   | 0.945329175    | 0.901374694   | 0.054051151  |
| 5                                | 0.32170856    | -0.709052759   | -0.267960801   | 1.518143826   | -0.318253704   | -0.197176073  | 0.858758858  | -0.339731477  | 0.678986474   | -1.071058177   | -1.452562124  | -0.06734958  |
| 6                                | -1.610343669  | -1.177030772   | -1.842423578   | -0.526757985  | -0.803065459   | -1.375519259  | -1.968567756 | -1.424800573  | -1.31402335   | -0.327382307   | -0.720950736  | -2.370230521 |
| 7                                | -0.845426861  | -1.128293914   | -0.612800156   | 0.663849463   | 1.495174189    | -0.898408472  | -0.106210756 | -0.30104515   | -0.086776368  | -0.48709107    | -0.922469043  | 0.112612712  |
| Region of Intest number in Atlas | 40            | 41             | 42             | 43            | 44             | 90            | 91           | 92            | 93            | 94             | 95            | 96           |

Values represent the activations/deactivations for each region of interest within each state as shown graphically in Figure 3. Changes in color represent divisions between networks as defined in Figure 3.

| State                            | RH_ContB_PFCld | RH_ContB_PFCIv | RH_ContB_PFCmp | RH_ContC_pCun | RH_ContC_Cingp | LH_DefaultA_IPL | LH_DefaultA_PFCd | LH_DefaultA_PCC | LH_DefaultA_PFCm | LH_DefaultB_Temp | LH_DefaultB_IPL |
|----------------------------------|----------------|----------------|----------------|---------------|----------------|-----------------|------------------|-----------------|------------------|------------------|-----------------|
| 0                                | -0.323632684   | 0.820145887    | 0.234397356    | -0.937619974  | 0.165327043    | 0.719019982     | 0.584976425      | 0.691195838     | 0.860524704      | 0.854689563      | 0.215419015     |
| 1                                | 1.607370381    | 0.457944459    | 1.421925658    | -1.184652546  | -1.058323734   | 1.516430046     | 0.772365876      | -0.141372164    | -0.458189097     | 1.004971442      | 1.551868083     |
| 2                                | 1.40015081     | 0.569314544    | 0.998150499    | 1.320989103   | 0.179232123    | 2.583140518     | 1.834762187      | 2.215102671     | 1.6664038        | 1.520855431      | 1.394491547     |
| 3                                | -0.311011851   | -0.285749425   | -0.61013297    | -0.434691245  | -0.269363842   | -2.073909918    | -1.460272118     | -2.007726536    | -2.083498642     | -1.853432538     | -1.358711268    |
| 4                                | -0.801141428   | 0.732612481    | -0.093135114   | -1.824143183  | 0.285551817    | -1.873867275    | -1.236323769     | -1.890908017    | -1.296756386     | -1.284744406     | -1.312494799    |
| 5                                | 0.352997326    | -0.958142267   | -0.338589627   | 1.439488758   | -0.207223059   | 0.0844054       | -0.012751671     | 0.265509252     | -0.120981689     | -0.17639747      | 0.221874937     |
| 6                                | -1.827059931   | -1.023710833   | -1.440871859   | -0.675649355  | -0.825562852   | -0.170088895    | -0.134221404     | 0.531803945     | 0.919141515      | 1.103953763      | 0.058831021     |
| 7                                | -0.774251885   | -0.430478725   | -0.321116629   | 0.825606376   | 1.710962754    | -2.239080399    | -1.523022743     | -1.183114839    | -0.706735352     | -1.916616472     | -1.228213179    |
| Region of Intest number in Atlas | 97             | 98             | 99             | 100           | 101            | 45              | 46               | 47              | 48               | 49               | 50              |

Values represent the activations/deactivations for each region of interest within each state as shown graphically in Figure 3. Changes in color represent divisions between networks as defined in Figure 3.

| State                            | LH_DefaultB_PFCd | LH_DefaultB_PFCi | LH_DefaultB_PFCv | LH_DefaultC_IPL | LH_DefaultC_Rsp | LH_DefaultC_PHC | LH_TempPar  | RH_DefaultA_Temp | RH_DefaultA_IPL | RH_DefaultA_PFCd | RH_DefaultA_PCC |
|----------------------------------|------------------|------------------|------------------|-----------------|-----------------|-----------------|-------------|------------------|-----------------|------------------|-----------------|
| 0                                | 1.105839765      | 0.709689008      | 0.764559069      | 0.203126404     | 0.265131177     | 0.551717616     | -0.36637715 | 1.85493721       | 0.102287822     | 0.575710467      | 0.773592809     |
| 1                                | 1.743013691      | 2.54168182       | 2.044420063      | -0.267344393    | -1.548278622    | -1.108315318    | 0.40076879  | -0.389489248     | 0.441772368     | -0.008388887     | -0.806523537    |
| 2                                | 1.630685339      | 1.674913714      | 0.436803136      | 1.470654252     | 1.547550163     | 0.786329666     | -0.09772339 | 1.520527153      | 2.237322834     | 1.718721979      | 2.611339903     |
| 3                                | -2.134698629     | -1.328755766     | -0.733765723     | -0.754485985    | -1.23382444     | -0.640639245    | -0.17919658 | -1.779668403     | -1.667821437    | -1.37524444      | -2.352994331    |
| 4                                | -1.10466118      | -0.834067905     | 0.016581567      | -1.18664085     | -1.665991525    | -0.514389461    | -0.76379746 | -0.162828027     | -1.974923901    | -0.899974118     | -2.115153511    |
| 5                                | -0.495457698     | -0.37011531      | -0.661838293     | 0.350887137     | 0.609010044     | -0.088322781    | 0.56656019  | -1.234288247     | 0.590122937     | -0.139099451     | 0.294456567     |
| 6                                | 0.768361911      | -0.694796559     | 0.101838626      | -0.014200523    | 0.909820417     | 0.783877777     | 0.99422621  | 0.937285296      | -0.092193496    | -0.425245845     | 0.605999468     |
| 7                                | -1.942049241     | -2.070317469     | -1.394277333     | -1.198000588    | -0.602739267    | -0.862354745    | -0.38207763 | -1.751072473     | -1.283787148    | -0.637759042     | -1.07914045     |
| Region of Intest number in Atlas | 51               | 52               | 53               | 54              | 55              | 56              | 57          | 102              | 103             | 104              | 105             |

Values represent the activations/deactivations for each region of interest within each state as shown graphically in Figure 3. Changes in color represent divisions between networks as defined in Figure 3.

| State                            | RH_DefaultA_PFCm | RH_DefaultB_Temp | RH_DefaultB_AntTemp | RH_DefaultB_PFCd | RH_DefaultB_PFCv | RH_DefaultC_IPL | RH_DefaultC_Rsp | RH_DefaultC_PHC | RH_TempPar  | LH_Striatum_sensory |
|----------------------------------|------------------|------------------|---------------------|------------------|------------------|-----------------|-----------------|-----------------|-------------|---------------------|
| 0                                | 1.214541499      | 0.731890949      | 1.304856962         | 1.313971113      | 0.481538274      | 0.006835098     | 0.237315526     | 0.738879039     | -0.48194713 | 0.504438594         |
| 1                                | -0.806669422     | 0.570513013      | 0.286110714         | 1.008064436      | 1.215359023      | -0.738346927    | -1.62715448     | -1.114200997    | -0.11650083 | 0.346712286         |
| 2                                | 1.306539235      | 1.228410504      | 1.276224467         | 1.60134508       | 0.698056029      | 1.411500857     | 1.406233745     | 0.616013452     | -0.11728303 | -0.47523804         |
| 3                                | -1.755370311     | -1.325588145     | -1.7640203          | -1.994107939     | -1.026341901     | -0.56254798     | -0.942059035    | -0.473980478    | -0.29614488 | -0.386735311        |
| 4                                | -0.361794851     | -0.569029161     | -0.518396222        | -0.584514653     | -0.333184363     | -1.197494896    | -1.457858835    | -0.231340232    | -0.78945503 | 1.05052651          |
| 5                                | -0.756574111     | -0.404010402     | -0.776990027        | -0.845731411     | -0.364273404     | 0.506897109     | 0.571063167     | -0.295693141    | 0.634979952 | -0.913359061        |
| 6                                | 0.715798955      | 0.195258872      | 1.058388391         | 0.44736469       | 0.216422666      | -0.010813494    | 0.659884256     | 0.792041615     | 1.22020368  | -0.247712342        |
| 7                                | -0.627367626     | -1.033712957     | -1.50337488         | -1.561803602     | -0.929883086     | -1.037524351    | -0.439470865    | -0.879549855    | -0.18893291 | 0.810007255         |
| Region of Intest number in Atlas | 106              | 107              | 108                 | 109              | 110              | 111             | 112             | 113             | 114         | 115                 |

Values represent the activations/deactivations for each region of interest within each state as shown graphically in Figure 3. Changes in color represent divisions between networks as defined in Figure 3.

| State                            | LS Striatum SaliencNetwork1 | LS Striatum SaliencNetwork2 | LH Accumbens | LH Striatum FrontoParietalNetwork | LH Striatum DefaultModeNetwork | sensory | sensory | SN | SN | AN- NAC right | FN |
|----------------------------------|-----------------------------|-----------------------------|--------------|-----------------------------------|--------------------------------|---------|---------|----|----|---------------|----|
| 0                                | 2.191220996                 | 0.50585222                  | 1.82872553   | 0.129542317                       | 0.412376979                    | 2.2681  | 0.5694  | 1  | 1  | 1.593990227   | 0  |
| 1                                | -0.408123355                | 0.432728097                 | -0.643769773 | 0.974325986                       | 0.508803896                    | -0.475  | 0.1335  | -0 | 0  | -0.689665065  | 0  |
| 2                                | 0.036367667                 | -0.616960341                | 0.120177133  | -0.29550419                       | 0.005970301                    | 0.0373  | -0.45   | -0 | -1 | 0.01324393    | -0 |
| 3                                | -0.506545344                | -0.262091636                | -0.785866874 | -0.325148145                      | -0.737130165                   | -0.54   | -0.52   | -0 | -0 | -0.732879382  | -1 |
| 4                                | 1.947254689                 | 1.276678796                 | 1.544161846  | 0.66445062                        | 0.494893045                    | 2.0259  | 1.1216  | 1  | 1  | 1.42171584    | 1  |
| 5                                | -2.267318668                | -1.003501513                | -1.890350614 | -0.519983926                      | -0.62808767                    | -2.356  | -1.01   | -2 | -1 | -1.688892597  | -1 |
| 6                                | -0.022824997                | -0.559299536                | -0.00676305  | -0.824957597                      | -0.43484743                    | -0.002  | -0.103  | -0 | -0 | 0.102398964   | -0 |
| 7                                | -0.541273634                | 1.117976466                 | 0.06455282   | 0.953155274                       | 0.76824259                     | -0.546  | 0.7636  | -0 | 1  | 0.182802974   | 1  |
| Region of Intest number in Atlas | 116                         | 117                         | 118          | 119                               | 120                            | 121     | 122     | ## | ## | 125           | ## |

Values represent the activations/deactivations for each region of interest within each state as shown graphically in Figure 3. Changes in color represent divisions between networks as defined in Figure 3.

| State                            | RH_Striatum_DefaultModeNetwork | LH_amygdala | RH_amygdala  |
|----------------------------------|--------------------------------|-------------|--------------|
| 0                                | 0.961222453                    | 1.396020672 | 1.570971984  |
| 1                                | -0.099219441                   | -0.18009257 | -0.660643723 |
| 2                                | 0.0848461                      | -0.09338999 | -0.107823984 |
| 3                                | -0.852562051                   | -0.20808364 | -0.536269319 |
| 4                                | 0.908206205                    | 1.151198896 | 1.382626662  |
| 5                                | -1.135857447                   | -1.37568386 | -1.649907331 |
| 6                                | -0.210306235                   | 0.324113027 | 0.756177291  |
| 7                                | 0.522402708                    | -0.60438057 | -0.755056184 |
| Region of Intest number in Atlas | 127                            | 128         | 129          |

Values represent the activations/deactivations for each region of interest within each state as shown graphically in Figure 3. Changes in color represent divisions between networks as defined in Figure 3.
